# Supplementary material for: A novel eco-friendly green approach to produce particalized eggshell membrane (PEM) for skin health applications
Source: Royal Society of Chemistry journal article supplement (doi:10.1039/d0bm01110j), 2020-01-01
Supplement: d0bm01110j1.pdf [file d0bm01110j1.pdf]

### Supplementary Tables and Figures

**TableS1.** Elemental analysis of PEM in various preparations analyzed by energy-dispersive x-ray spectroscopy (EDS).

| Element   | PEM, Weight (%) (Average $\pm$ SD) |                                |                               |                               |                                |
|-----------|------------------------------------|--------------------------------|-------------------------------|-------------------------------|--------------------------------|
|           | <15 $\mu$ m                        | <53 $\mu$ m                    | 53-104 $\mu$ m                | 104-381 $\mu$ m               | Intact membranes               |
| Carbon    | 68.30 $\pm$ 9.25 <sup>a</sup>      | 60.72 $\pm$ 4.55 <sup>ab</sup> | 55.09 $\pm$ 3.96 <sup>b</sup> | 70.36 $\pm$ 4.65 <sup>a</sup> | 64.13 $\pm$ 5.74 <sup>ab</sup> |
| Nitrogen  | 12.61 $\pm$ 8.45 <sup>ab</sup>     | 18.65 $\pm$ 3.42 <sup>ab</sup> | 21.36 $\pm$ 2.82 <sup>a</sup> | 9.17 $\pm$ 3.34 <sup>b</sup>  | 13.82 $\pm$ 6.07 <sup>ab</sup> |
| Oxygen    | 16.67 $\pm$ 1.72 <sup>ab</sup>     | 18.29 $\pm$ 3.47 <sup>ab</sup> | 21.13 $\pm$ 2.98 <sup>a</sup> | 13.36 $\pm$ 3.64 <sup>b</sup> | 19.87 $\pm$ 1.29 <sup>a</sup>  |
| Magnesium | 0.01 $\pm$ 0.02                    | 0                              | 0                             | 0                             | 0                              |
| Sulfur    | 2.21 $\pm$ 0.06 <sup>b</sup>       | 2.25 $\pm$ 0.55 <sup>b</sup>   | 2.34 $\pm$ 0.87 <sup>b</sup>  | 6.88 $\pm$ 2.58 <sup>a</sup>  | 2.15 $\pm$ 1.07 <sup>b</sup>   |
| Calcium   | 0.08 $\pm$ 0.11 <sup>ab</sup>      | 0.07 $\pm$ 0.05 <sup>b</sup>   | 0.06 $\pm$ 0.06 <sup>b</sup>  | 0.22 $\pm$ 0.06 <sup>a</sup>  | 0.01 $\pm$ 0.03 <sup>b</sup>   |

Values represent Mean  $\pm$  SD from three independent measurements. Values with different superscript letters (Tukey multiple means comparison) are significantly different (ANOVA;  $P < 0.05$ ).

**Table S2.** Calcium content of manually processed PEM measured by calcium colorimeter with the associated kit (Hanna HI 758, ITM Instruments Inc., Canada)

| Type of ESM processing        | CaCO <sub>3</sub> (ES) content (wt %) in 0.2-1 g |
|-------------------------------|--------------------------------------------------|
| Manually processed- 381-504µm | 0.39±0.16                                        |
| Manually processed-104-381µm  | 0.42±0.22                                        |
| Manually processed-53-104µm   | 1.55±1.15                                        |
| Manually processed-<53µm      | 0.49±0.29                                        |
| Manually processed-<15µm      | 0.37±0.20                                        |
| Industrially processed        | 2.64±0.12                                        |

Values represent Mean ± SD from 2 independent samples each done in triplicate (n = 3).

**Table S3.** Amino acid composition of PEM in various size (Hospital for Sick Children, Peter Gilgan Centre for Research & Learning, SPARC Biocentre, Toronto, ON)

| Amino acid    | mole%          |                  |                 |                 |                 |                  | Mean± Std. Dev |
|---------------|----------------|------------------|-----------------|-----------------|-----------------|------------------|----------------|
|               | PEM (Unsieved) | PEM (104-381 µm) | PEM (53-104 µm) | PEM (<53µm, R1) | PEM (<53µm, R2) | PEM (Emulsiflex) |                |
| Asx (Asp+Asn) | 7.5            | 7.6              | 7.7             | 7.6             | 7.5             | 7.7              | 7.6±0.1        |
| Glx (Glu+Gln) | 9.9            | 10.2             | 10.3            | 10.1            | 10.0            | 10.2             | 10.1±0.1       |
| OH-Pro        | 0.9            | 0.9              | 0.9             | 0.9             | 0.9             | 0.9              | 0.9±0.0        |
| Ser           | 6.5            | 6.6              | 6.8             | 6.7             | 6.5             | 6.7              | 6.6±0.1        |
| Gly           | 9.8            | 9.9              | 10.0            | 10.0            | 9.8             | 10.0             | 9.9±0.1        |
| His           | 3.1            | 3.2              | 3.2             | 3.2             | 3.1             | 3.2              | 3.2±0.0        |
| Arg           | 5.0            | 5.1              | 5.2             | 5.1             | 5.0             | 5.2              | 5.1±0.1        |
| Thr           | 5.9            | 6.0              | 6.1             | 6.0             | 5.9             | 6.1              | 6.0±0.1        |
| Ala           | 3.5            | 3.5              | 3.6             | 3.6             | 3.5             | 3.6              | 3.5±0.0        |
| Pro           | 9.6            | 9.7              | 9.9             | 9.7             | 9.6             | 9.8              | 9.7±0.1        |
| Tyr           | 1.3            | 1.3              | 1.3             | 1.4             | 1.3             | 1.4              | 1.3±0.0        |
| Val           | 7.7            | 7.7              | 7.8             | 7.7             | 7.6             | 7.7              | 7.7±0.1        |
| Met           | 3.3            | 3.3              | 3.4             | 3.3             | 3.3             | 3.3              | 3.3±0.0        |
| Ile           | 3.1            | 3.1              | 3.2             | 3.2             | 3.1             | 3.1              | 3.1±0.0        |
| Leu           | 4.3            | 4.3              | 4.4             | 4.4             | 4.3             | 4.4              | 4.4±0.1        |
| OH-Lys        | 0.4            | 0.4              | 0.4             | 0.5             | 0.4             | 0.4              | 0.4±0.0        |
| Phe           | 1.7            | 1.7              | 1.7             | 1.7             | 1.7             | 1.7              | 1.7±0.0        |
| Lys           | 3.1            | 3.2              | 3.1             | 3.2             | 3.1             | 3.1              | 3.1±0.0        |
| Cys A         | 13.2           | 12.3             | 11.1            | 11.6            | 13.4            | 11.6             | 12.2±0.9       |

**Table S4.** Amino acid composition of the PEM powder (WP-1) as compared to the industrial ESM

| Amino acid    | mole%    |                              |                   |
|---------------|----------|------------------------------|-------------------|
|               | PEM      | I-ESM industrial dry Batch 2 | Reference values* |
| Asx (Asp+Asn) | 7.6±0.1  | 2.3                          | 7.9±0.4           |
| Glx (Glu+Gln) | 10.1±0.1 | 6.3                          | 10.5±0.5          |
| OH-Pro        | 0.9±0.0  | 0.9                          | 1.1±0.2           |
| Ser           | 6.6±0.1  | 8.2                          | 6.7±0.5           |
| Gly           | 9.9±0.1  | 11.7                         | 10.4±0.5          |
| His           | 3.2±0.0  | 3.7                          | 3.1±0.3           |
| Arg           | 5.1±0.1  | 6.0                          | 5.2±0.2           |
| Thr           | 6.0±0.1  | 6.7                          | 6.1±0.3           |
| Ala           | 3.5±0.0  | 5.5                          | 4.0±0.1           |
| Pro           | 9.7±0.1  | 10.5                         | 10.6±0.8          |
| Tyr           | 1.3±0.0  | 1.9                          | 1.3±0.2           |
| Val           | 7.7±0.1  | 9.2                          | 7.5±1.1           |
| Met           | 3.3±0.0  | 3.9                          | 3.2±0.4           |
| Ile           | 3.1±0.0  | 4.1                          | 3.2±0.4           |
| Leu           | 4.4±0.1  | 6.1                          | 4.7±0.2           |
| OH-Lys        | 0.4±0.0  | 0.9                          | 0.2±0.2           |
| Phe           | 1.7±0.0  | 2.3                          | 1.4±0.3           |
| Lys           | 3.1±0.0  | 2.9                          | 3.2±0.2           |
| Cys A         | 12.2±0.9 | 6.9                          | 9.9±0.7           |

\* Average of 5 references **1.** Leach RM, Jr., Rucker RB, Van Dyke GP (1981) Egg shell membrane protein: a nonelastin desmosine/isodesmosine-containing protein. Arch Biochem Biophys 207: 353-359; **2.** Baumgartner S, Brown DJ, Salevsky E, Jr., Leach RM, Jr. (1978) Copper deficiency in the laying hen. J Nutr 108: 804-811; **3.** Salevsky E, Leach RM (1980) Studies on the Organic-Components of Shell Gland Fluid and the Hens Eggshell. Poultry Science 59: 438-443; **4.** Crombie G, Snider R, Faris B, Franzblau C (1981) Lysine-Derived Cross-Links in the Eggshell Membrane. Biochimica et Biophysica Acta 640: 365-367; **5.** Ahmed TAE, Suso HP, Maqbool A, Hincke MT (2019) Processed eggshell membrane powder: Bioinspiration for an innovative wound healing product. Mater Sci Eng C Mater Biol Appl; 95:192-203

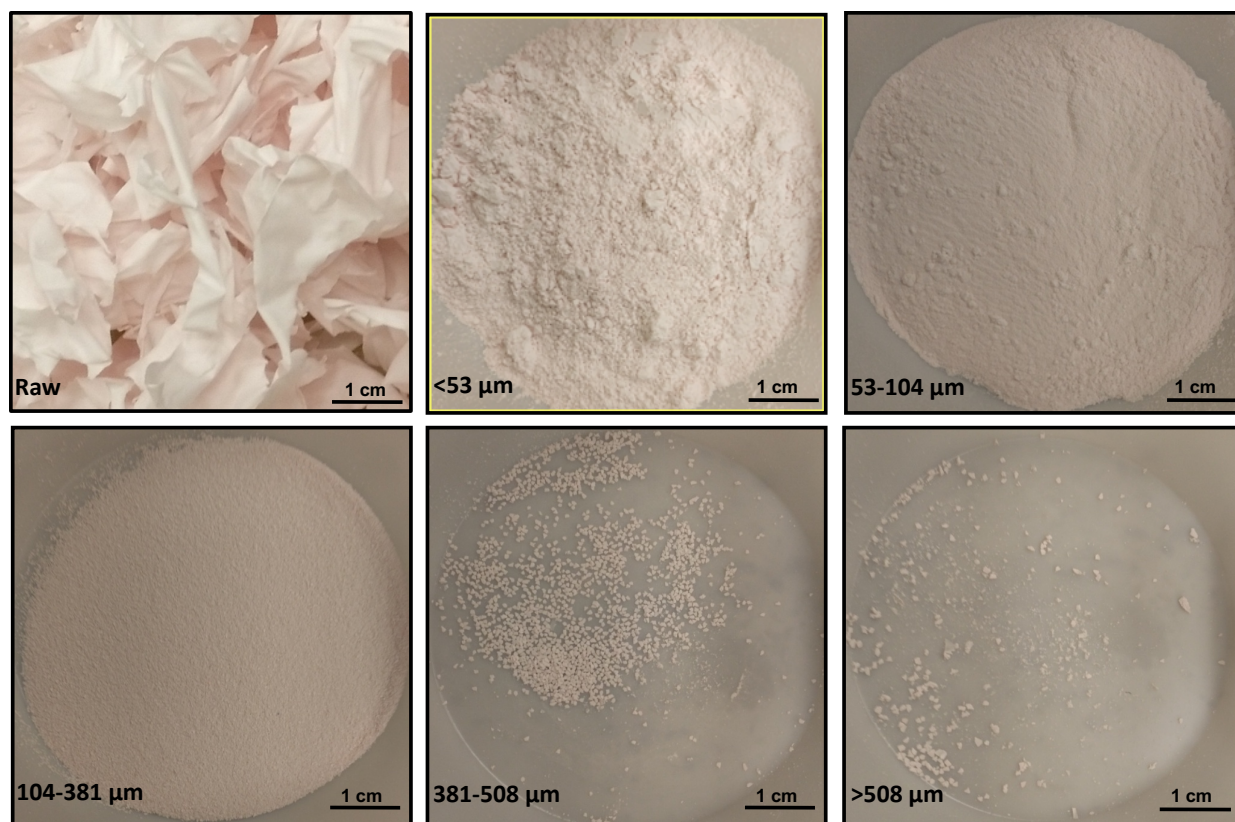

**Figure S1.** Macroscopic appearance of processed PEM after cryogenic grinding and sieving.

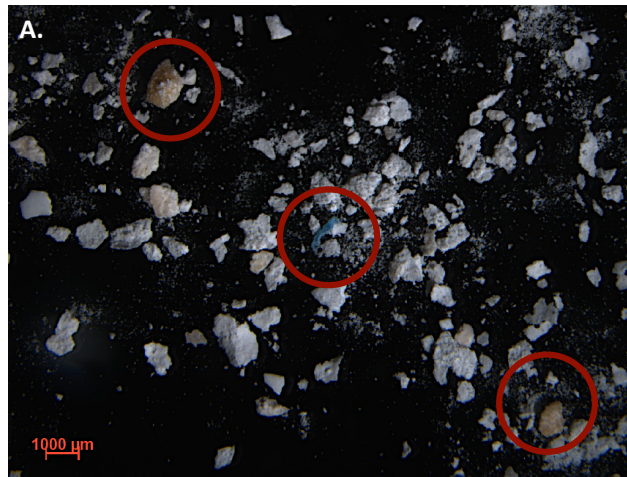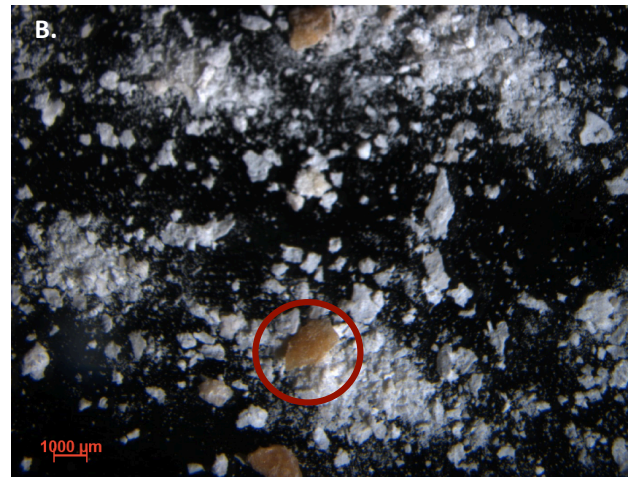

**Figure S2.** Dry industrial ESM (I-ESM) visualized by stereomicroscopy showing contamination with **A.** Egg shell and environmental debris **B.** Yolk at 7.5X magnification.

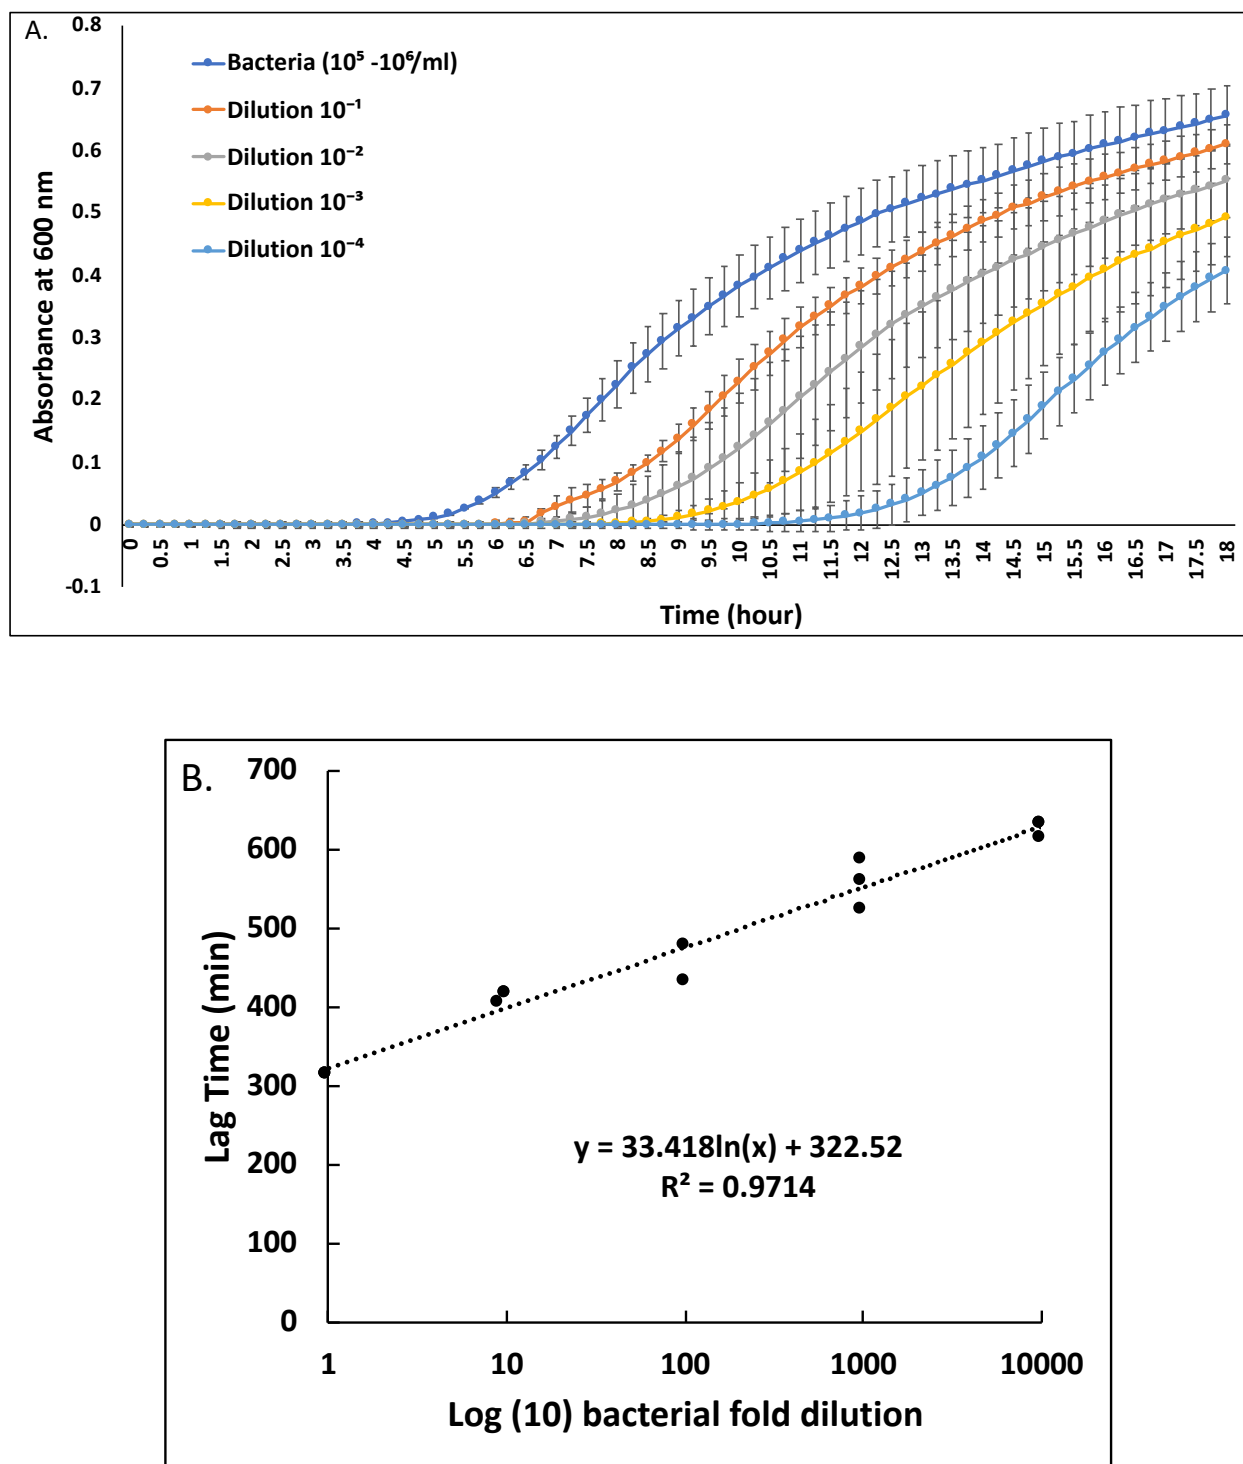

**Figure S3.** The antimicrobial activity associated with PEM treatment was measured as bacterial growth inhibition calculated from growth curves. **A.** Serially ten-fold dilution series of *S. aureus* obtained from the uninhibited control. Most concentrated bacterial solution (cell density =  $10^5$ - $10^6$ ) was serially diluted in a microplate (in triplicate) and bacterial growth was monitored by measuring the optical density at 600 nm every 15 min for 18 hours. **B.** A standard curve was

generated to establish a correlation between the number of viable bacterial cells in the inoculum and bacterial growth lag time. This standard curve was used to determine bacterial growth inhibition.
